# Supplementary material for: Control Over the Morphology of Electrospun Microfibrous Mats of a Polymer of Intrinsic Microporosity
Source: MDPI journal article supplement (doi:10.3390/membranes11060422), 2021-05-31
Supplement: s1 [file s1]

# Control Over the Morphology of Electrospun Microfibrous Mats of a Polymer of Intrinsic Microporosity

Elsa Lasseuguette <sup>1,\*</sup>, Richard Malpass-Evans <sup>2</sup>, John M. Tobin <sup>2</sup>, Neil B. McKeown <sup>2</sup> and Maria-Chiara Ferrari <sup>1</sup>

<sup>1</sup> School of Engineering, University of Edinburgh, Robert Stevenson Road, Edinburgh EH9 3FB, UK; M.Ferrari@ed.ac.uk

<sup>2</sup> EaStCHEM School of Chemistry, University of Edinburgh, David Brewster Road, Edinburgh EH9 3FJ, UK; R.Malpass-Evans@ed.ac.uk (R.M.-E.); J.Tobin@ed.ac.uk (J.M.T.); Neil.McKeown@ed.ac.uk (N.B.M.)

\* Correspondence: e.lasseuguette@ed.ac.uk

**Citation:** Lasseuguette, E.; Malpass-Evans, R.; Tobin, J.M.; McKeown, N.B.; Ferrari, M.-C. Control over the morphology of electrospun microfibrous mats of a polymer of intrinsic microporosity. *Membranes* **2021**, *11*, 422. <https://doi.org/10.3390/membranes11060422>

Academic Editor: Rasel Das and Guorong Xu

Received: 16 April 2021

Accepted: 27 May 2021

Published: 31 May 2021

**Publisher's Note:** MDPI stays neutral with regard to jurisdictional claims in published maps and institutional affiliations.

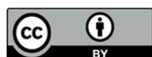

**Copyright:** © 2021 by the authors. Submitted for possible open access publication under the terms and conditions of the Creative Commons Attribution (CC BY) license (<https://creativecommons.org/licenses/by/4.0/>).

## Physical properties

**Table S1.** Surface tension of solvent systems.

|                                  | Surface tension<br>(mN/m)<br>[+/-0.1 mN/m] |
|----------------------------------|--------------------------------------------|
| CHCl <sub>3</sub> /nPL<br>(10/0) | 28.31                                      |
| CHCl <sub>3</sub> /nPL<br>(9/1)  | 28.32                                      |
| CHCl <sub>3</sub> /nPL<br>(7/3)  | 28.43                                      |
| CHCl <sub>3</sub> /nPL<br>(5/5)  | 28.83                                      |
| CHCl <sub>3</sub> /nPL<br>(3/7)  | 28.93                                      |
| CHCl <sub>3</sub> /nPL<br>(1/9)  | 29.28                                      |
| CHCl <sub>3</sub> /nPL<br>(0/10) | 29.55                                      |

**Table S2.** Characterizations of electrospinning solutions and corresponding electrospun mats.

| 20%PIMEATB<br>in                 | Electrospinning solutions                               |                                 | Electrospun sample                 |                         |                         |                                                                  |                                                             |
|----------------------------------|---------------------------------------------------------|---------------------------------|------------------------------------|-------------------------|-------------------------|------------------------------------------------------------------|-------------------------------------------------------------|
|                                  | Conductivity<br>( $\mu\text{S}/\text{cm}$ )<br>[+/- 5%] | Viscosity<br>(Visual<br>aspect) | Contact<br>angle<br>( $^{\circ}$ ) | FD<br>( $\mu\text{m}$ ) | PD<br>( $\mu\text{m}$ ) | $P_{\text{H}_2\text{O}}$<br>( $10^{-2}\text{Bar}$ )<br>[+/- 0.1] | $R_{\text{Air}}$<br>( $10^{+7} \text{ m}^{-1}$ )<br>[+/-5%] |
| CHCl <sub>3</sub> /nPL<br>(10/0) | 0.02                                                    | -                               | 126                                | 7.9<br>(+/-0.5)         | 51.4<br>(+/- 0.5)       | 0.5                                                              | 4.9                                                         |
| CHCl <sub>3</sub> /nPL<br>(9/1)  | 0.08                                                    |                                 |                                    | 7.2<br>(+/- 0.9)        | 30.3<br>(+/- 0.5)       | 2.6                                                              | 9.2                                                         |
| CHCl <sub>3</sub> /nPL<br>(7/3)  | 0.25                                                    |                                 |                                    | 5.3<br>(+/- 0.5)        | 28<br>(+/- 0.3)         | 1                                                                | 9.5                                                         |
| CHCl <sub>3</sub> /nPL<br>(5/5)  | 0.42                                                    |                                 |                                    | 4.7<br>(+/- 0.5)        | 20.3<br>(+/- 0.2)       | 1.3                                                              | 10.1                                                        |
| CHCl <sub>3</sub> /nPL<br>(3/7)  | 0.64                                                    |                                 | No fibres                          |                         |                         |                                                                  |                                                             |
| CHCl <sub>3</sub> /nPL<br>(1/9)  | 0.78                                                    |                                 |                                    |                         |                         |                                                                  |                                                             |
| CHCl <sub>3</sub> /nPL<br>(0/10) | 0.96                                                    | +                               |                                    |                         |                         |                                                                  |                                                             |

**Water contact angle**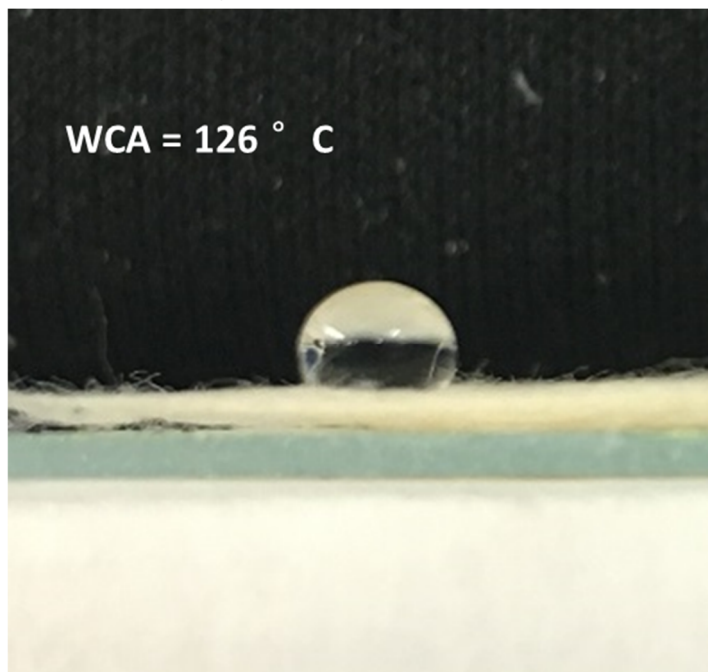**Figure S1:** Water contact angle on PIMEATB fibres from solution (9/1).
